# Supplementary material
Source: PubMed Central journal article supplement (PMC3465511)
Supplement: NIHMS384385-supplement-Supp_App_S1.pdf [file NIHMS384385-supplement-Supp_App_S1.pdf]

**Appendix: Papers published previously from which the current database was constructed**

1. Bharucha AE, Ravi K, Zinsmeister AR. Comparison of selective M3 and nonselective muscarinic receptor antagonists on gastrointestinal transit and bowel habits in humans. *Am J Physiol* 2010; 299: G215-G219.
2. Bharucha AE, Seide B, Guan Z, Andrews CN, Zinsmeister AR. Effect of tolterodine on gastrointestinal transit and bowel habits in healthy subjects. *Neurogastroenterol Motil* 2008; 20: 643-648.
3. Bharucha AE, Skaar T, Andrews CN, Camilleri M, Philips S, Seide B, Burton D, Baxter K, Zinsmeister AR. Relationship of cytochrome P450 pharmacogenetics to the effects of yohimbine on gastrointestinal transit and catecholamines in healthy subjects. *Neurogastroenterol Motil* 2008; 20: 891-899.
4. Camilleri M, Bharucha AE, Ueno R, Burton D, Thomforde GM, Baxter K, McKinzie S, Zinsmeister AR. Effect of a selective chloride channel activator, lubiprostone, on gastrointestinal transit, gastric sensory, and motor functions in healthy volunteers. *Am J Physiol* 2006; 290: G942-G947.
5. Viramontes BE, Malcolm A, Camilleri M, Szarka LA, McKinzie S, Burton DD, Zinsmeister AR. Effects of  $\alpha_2$ -adrenergic agonist on gastrointestinal transit, colonic motility and sensation in humans. *Am J Physiol* 2001; 281: G1468-G1476.
6. Camilleri M, Vazquez-Roque MI, Burton D, Ford T, McKinzie S, Zinsmeister AR, Druzgala P. Pharmacodynamic effects of a novel prokinetic 5-HT receptor agonist, ATI-7505, in humans. *Neurogastroenterol Motil* 2007; 19: 30-38.
7. Castillo EJ, Camilleri M, Locke GR, Burton DD, Stephens DA, Geno DM, Zinsmeister AR. A community-based, controlled study of the epidemiology and pathophysiology of dyspepsia. *Clin Gastroenterol Hepatol* 2004; 2: 985-996.
8. Castillo EJ, Delgado-Aros S, Camilleri M, Burton D, Stephens D, O'Connor-Semmes R, Walker A, Shachoy-Clark A, Zinsmeister AR. Effect of oral CCK-1 agonist GI181771X on fasting and postprandial gastric functions in healthy volunteers. *Am J Physiol* 2004; 287: G363-G369.
9. Cremonini F, Camilleri M, Vazquez Roque M, McKinzie S, Burton D, Baxter K, Zinsmeister AR. Obesity does not increase effects of synthetic ghrelin on human gastric motor functions. *Gastroenterology* 2006; 131: 1431-1439.
10. Delgado-Aros S, Chial HJ, Camilleri M, Szarka LA, Weber FT, Jacob J, Ferber I, McKinzie S, Burton DD, Zinsmeister AR. Effects of a kappa-opioid agonist, asimadoline, on satiation and GI motor and sensory functions in humans. *Am J Physiol* 2003; 284: G558-G566.

11. Esfandyari T, Camilleri M, Ferber I, Burton D, Baxter K, Zinsmeister AR. Effect of a cannabinoid agonist on gastrointestinal transit and postprandial satiation in healthy human subjects: a randomized, placebo-controlled study. *Neurogastroenterol Motil* 2006; 18: 831-838.
12. Gonenne J, Camilleri M, Ferber I, Burton D, Baxter K, Keyashian K, Foss J, Wallin B, Du W, Zinsmeister AR. Effect of alvimopan and codeine on gastrointestinal transit: a randomized controlled study. *Clin Gastroenterol Hepatol* 2005; 3: 784-791.
13. Gonenne J, Esfandyari T, Camilleri M, Burton DD, Stephens DA, Baxter KL, Zinsmeister AR, Bharucha AE. Effect of female sex hormone supplementation and withdrawal on gastrointestinal and colonic transit in postmenopausal women. *Neurogastroenterol Motil* 2006; 18: 911-918.
14. Grudell AB, Camilleri M, Jensen KL, Foxx-Orenstein AE, Burton DD, Ryks MD, Baxter KL, Cox DS, Dukes GE, Kelleher DL, Zinsmeister AR. Dose-response effect of a beta3-adrenergic receptor agonist, solabegron, on gastrointestinal transit, bowel function, and somatostatin levels in health. *Am J Physiol* 2008; 294: G1114-G1119.
15. Jeong ID, Camilleri M, Shin A, Iturrino J, Boldingh A, Busciglio I, Burton D, Ryks M, Rhoten D, Zinsmeister AR. A randomised, placebo-controlled trial comparing the effects of tapentadol and oxycodone on gastrointestinal and colonic transit in healthy humans. *Aliment Pharmacol Ther* 2012 Feb 21. doi: 10.1111/j.1365-2036.2012.05040.x. [Epub ahead of print]
16. Manabe N, Camilleri M, Rao A, Wong BS, Burton D, Busciglio I, Zinsmeister AR, Haruma K. Effect of daikenchuto (TU-100) on gastrointestinal and colonic transit in humans. *Am J Physiol* 2010; 298: G970-G975.
17. Manini ML, Camilleri M, Goldberg M, Sweetser S, McKinzie S, Burton D, Wong S, Kitt MM, Li YP, Zinsmeister AR. Effects of Velusetrag (TD-5108) on gastrointestinal transit and bowel function in health and pharmacokinetics in health and constipation. *Neurogastroenterol Motil* 2010; 22: 42-49, e7-8.
18. Odunsi-Shiyanbade ST, Camilleri M, McKinzie S, Burton D, Carlson P, Busciglio IA, Lamsam J, Singh R, Zinsmeister AR. Effects of chenodeoxycholate and a bile acid sequestrant, colestevlam, on intestinal transit and bowel function. *Clin Gastroenterol Hepatol* 2010; 8:159-165.
19. Odunsi ST, Vázquez-Roque MI, Camilleri M, Papatathanasopoulos A, Clark MM, Wodrich L, Lempke M, McKinzie S, Ryks M, Burton D, Zinsmeister AR. Effect of alginate on satiation, appetite, gastric function, and selected gut satiety hormones in overweight and obesity. *Obesity* 2010; 18: 1579-1584.
20. Park MI, Ferber I, Camilleri M, Allenby K, Trillo R, Burton D, Zinsmeister AR. Effect of atilimotin on gastrointestinal transit in healthy subjects: a randomized, placebo-controlled study. *Neurogastroenterol Motil* 2006; 18: 28-36.

21. Vazquez Roque MI, Camilleri M, Clark MM, Tepoel DA, Jensen MD, Graszer KM, Kalsy SA, Burton DD, Baxter KL, Zinsmeister AR. Alteration of gastric functions and candidate genes associated with weight reduction in response to sibutramine. *Clin Gastroenterol Hepatol* 2007; 5: 829-837.

22. Wong BS, Rao AS, Camilleri M, Manabe N, McKinzie S, Busciglio I, Burton DD, Ryks M, Zinsmeister AR. The effects of methylnaltrexone alone and in combination with acutely administered codeine on gastrointestinal and colonic transit in health. *Aliment Pharmacol Ther* 2010; 32: 884-893.
